# Supplementary material for: Injuries, Pain, and Catastrophizing Level in Gymnasts: A Retrospective Analysis of a Cohort of Spanish Athletes
Source: MDPI journal article supplement (doi:10.3390/healthcare10050890), 2022-05-12
Supplement: s1 [file s1]

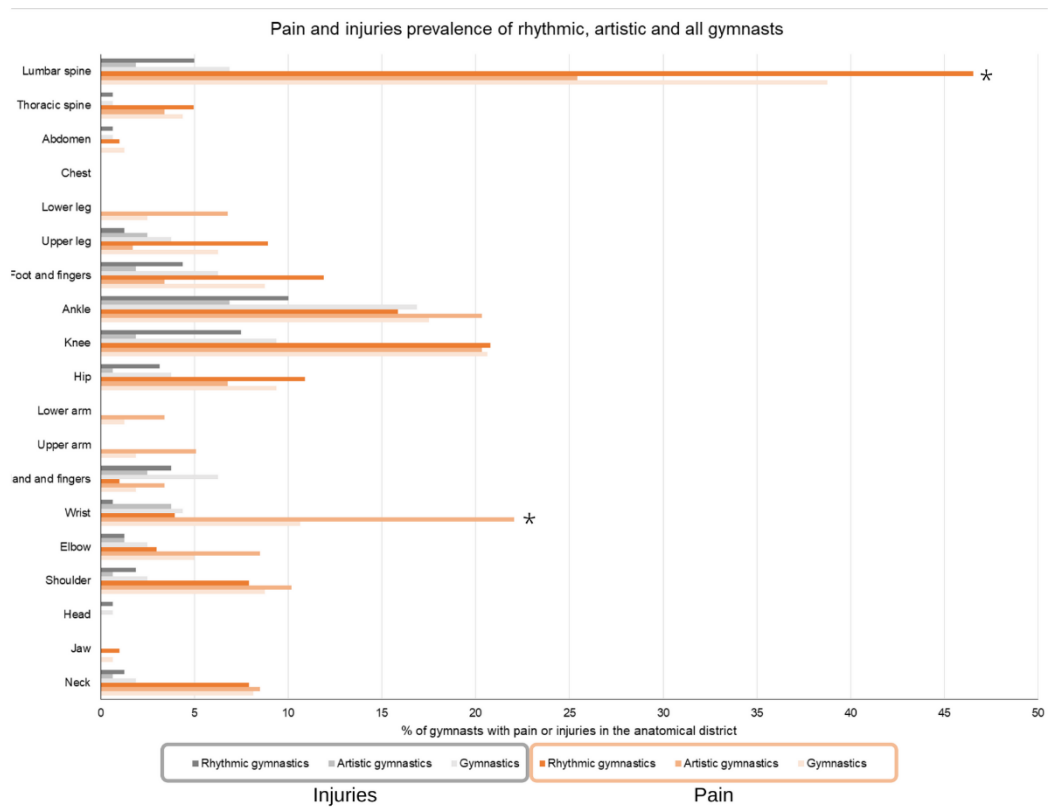

**Figure S1.** Prevalence of pain and injuries of rhythmic, artistic, and all gymnasts.

**Table S1.** Socio-demographic characteristics, injuries, pain level and catastrophizing level for FEMALE gymnasts.

|                                          | Total<br>(n =150) | Artistic<br>(n = 50) | Rhythmic<br>(n = 100) |
|------------------------------------------|-------------------|----------------------|-----------------------|
| Age (yrs) <sup>a</sup>                   | 16.7 (2.8)        | 16.2 (3.5)           | 16.9 (2.6)            |
| BMI (kg/m <sup>2</sup> ) <sup>a</sup>    | 20.2 (2.3)        | 20.6 (2.3)           | 20.0 (2.2)            |
| Experience (yrs) <sup>a</sup>            | 9.5 (4.0)         | 8.6 (4.6)            | 9.8 (3.5)             |
| Competition Level (% elite)              | 18.0              | 34.0                 | 10.0                  |
| Training volume (hrs/wk)                 | 17.1 (12.4)       | 20.0 (16.2)*         | 15.6 (9.8)            |
| Injured in this season (%)               | 48.0              | 44.0                 | 50.0                  |
| Injuries (n)                             | 104               | 37                   | 67                    |
| PCS (total score) <sup>a</sup>           | 21.4 (10.2)       | 20.4 (9.8)           | 21.9 (10.5)           |
| PCS (Rumination) (score) <sup>a</sup>    | 8.3 (4.1)         | 8.2 (4.0)            | 8.3 (4.1)             |
| PCS (Helplessness) (score) <sup>a</sup>  | 8.2 (4.7)         | 7.4 (4.3)            | 8.6 (4.8))            |
| PCS (Magnification) (score) <sup>a</sup> | 4.9 (2.8)         | 4.8 (2.9)            | 5.0 (2.8)             |
| Pain existence (%)                       | 73.3              | 66.0                 | 77.0                  |

|                                     |           |           |           |
|-------------------------------------|-----------|-----------|-----------|
| Pain in 1 district (%)              | 29.3      | 24.0      | 32.0      |
| Pain in 2 district (%)              | 27.3      | 22.0      | 30.0      |
| Pain in $\geq 3$ district (%)       | 16.7      | 20.0      | 15.0      |
| Pain Peak (0-10 score) <sup>a</sup> | 4.3 (3.1) | 3.8 (3.1) | 4.6 (3.1) |

PCS, pain catastrophizing scale; <sup>a</sup>, values are given as mean (standard deviation); \*, significant differences compared to rhythmic gymnastics (p < 0.05).
